# Supplementary material for: Impact of intrapartum antibiotic prophylaxis on the oral and fecal bacteriomes of children in the first week of life
Source: PubMed Central journal article supplement (PMC11303690; doi:10.1038/s41598-024-68953-z), 2024-08-06
Supplement: 41598_2024_68953_MOESM4_ESM.pdf [file 41598_2024_68953_MOESM4_ESM.pdf]

## Supplementary Material

**Table S1.** Comparison of numbers of ASVs and Shannon indices in neonatal oral and fecal samples between + IAP groups

| <b>Neonatal oral swab</b> |          |                       |                       |                      |                       |
|---------------------------|----------|-----------------------|-----------------------|----------------------|-----------------------|
|                           | <b>n</b> | <b>Number of ASVs</b> |                       | <b>Shannon index</b> |                       |
|                           |          | <b>median</b>         | <b><i>p</i>-value</b> | <b>median</b>        | <b><i>p</i>-value</b> |
| <b>+IAP CS</b>            | 18       | 9                     | 0.899                 | 1.149                | 0.145                 |
| <b>+IAP VD</b>            | 15       | 9                     |                       | 0.510                |                       |

  

| <b>Neonatal meconium</b> |          |                       |                       |                      |                       |
|--------------------------|----------|-----------------------|-----------------------|----------------------|-----------------------|
|                          | <b>n</b> | <b>Number of ASVs</b> |                       | <b>Shannon index</b> |                       |
|                          |          | <b>median</b>         | <b><i>p</i>-value</b> | <b>median</b>        | <b><i>p</i>-value</b> |
| <b>+IAP CS</b>           | 9        | 10                    | 0.388                 | 0.747                | 0.065                 |
| <b>+IAP VD</b>           | 10       | 7                     |                       | 1.026                |                       |

  

| <b>Neonatal transitional stool</b> |          |                       |                       |                      |                       |
|------------------------------------|----------|-----------------------|-----------------------|----------------------|-----------------------|
|                                    | <b>n</b> | <b>Number of ASVs</b> |                       | <b>Shannon index</b> |                       |
|                                    |          | <b>median</b>         | <b><i>p</i>-value</b> | <b>median</b>        | <b><i>p</i>-value</b> |
| <b>+IAP CS</b>                     | 9        | 13                    | 0.592                 | 1.646                | 0.083                 |
| <b>+IAP VD</b>                     | 5        | 9                     |                       | 0.373                |                       |

N, number of cases; ASVs, amplicon sequence variants; +IAP, with intrapartum antibiotic prophylaxis; -IAP, without intrapartum antibiotic prophylaxis; CS, C-section; VD, vaginal delivery
